# Supplementary material
Source: HighWire-hosted journal article supplement (https://rmdopen.bmj.com/content/3/1/e000416)
Supplement: inline-supplementary-material-1 [file inline-supplementary-material-1.pdf]

**Supplementary Figure 1. Mean scores at each visit through week 24 for (A) Patient Global Assessment (PtGA), (B) Pain Visual Analogue Scale (Pain VAS), (C) Health Assessment Questionnaire-Disability Index (HAQ-DI), (D) FACIT-Fatigue (FACIT-F)**

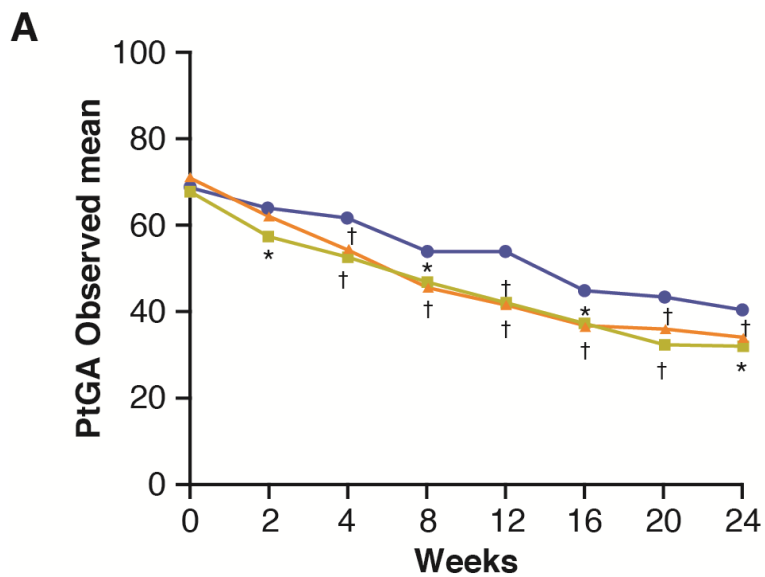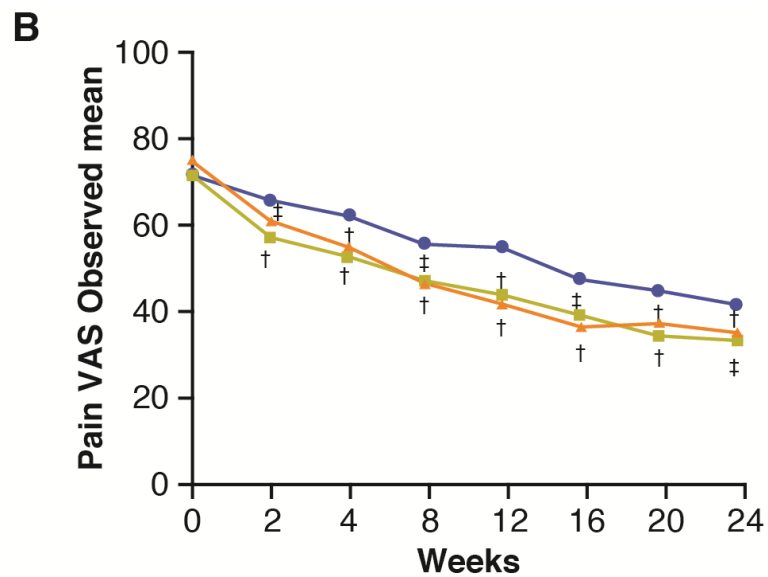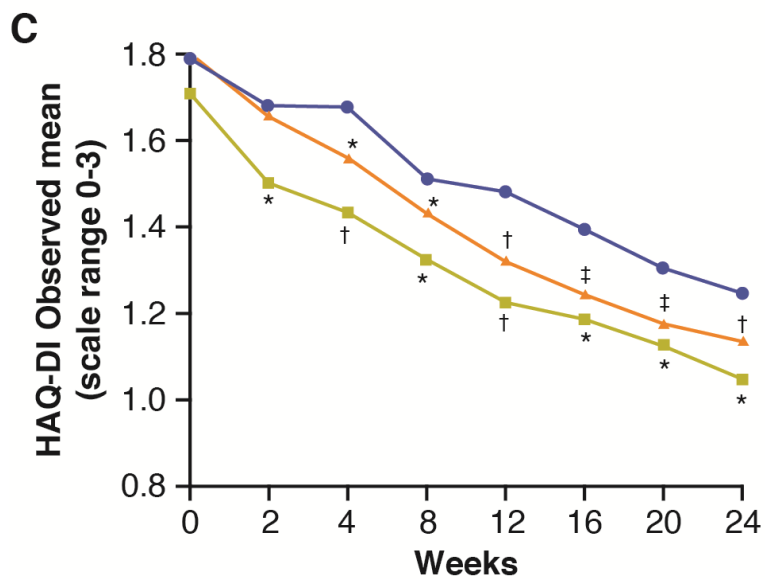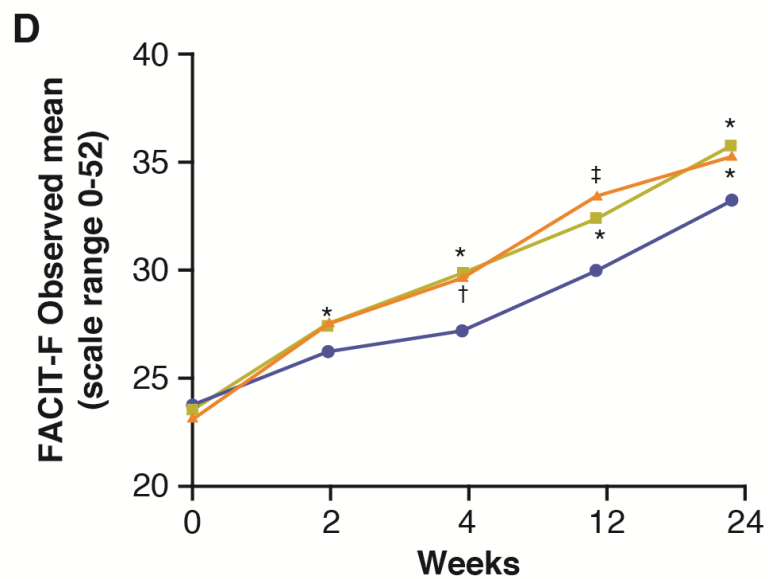

● Placebo + csDMARDs      ▲ Sarilumab 200 mg q2w + csDMARDs      ■ Sarilumab 150 mg q2w + csDMARDs

(A) \* P < 0.01 and †P ≤ 0.0001 versus placebo. All p-values are nominal.

(B) \* P < 0.05, †P ≤ 0.0001, and ‡P < 0.001 versus placebo. All p-values are nominal. (C) \* P < 0.05, †P < 0.001, and ‡P ≤ 0.0001 versus placebo. Only weeks 12 and 24 were in testing hierarchy; all other p-values are nominal. (D) \* P < 0.05, †P < 0.001, and ‡P ≤ 0.0001 versus placebo. All p-values are nominal; Week 24 was in testing hierarchy but was below hierarchy break.

csDMARDs, conventional synthetic disease-modifying anti-rheumatic drugs.

**Supplementary Figure 2. Post hoc analysis of percentage of patients reporting scores  $\geq$  Normative Values on FACIT-F and SF-36 at baseline and week 24.**

**\* $p < 0.05$  versus placebo.**

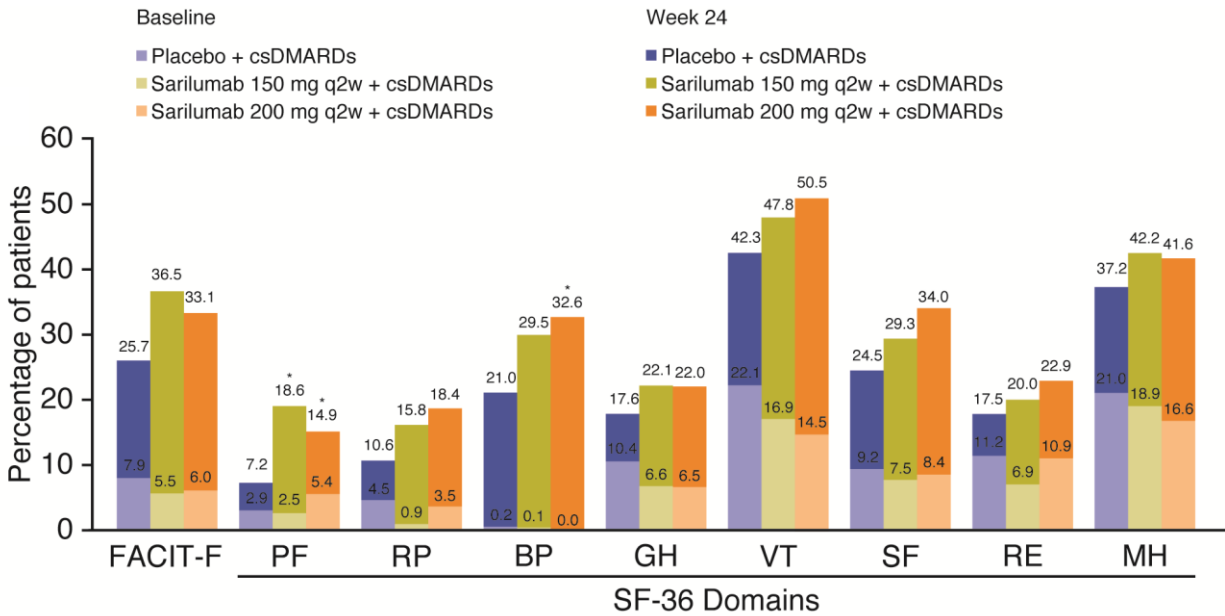

FACIT-F, Functional Assessment of Chronic Illness Therapy–Fatigue scale; SF-36, Short Form 36 Health Survey version 2 (PF, Physical Functioning; RP, Role Physical; BP, Bodily Pain; GH, General Health perceptions; VT, Vitality; SF, Social Functioning; RE, Role Emotional; MH, Mental Health).
